# Supplementary material for: Genomewide CRISPR knockout screen identified PLAC8 as an essential factor for SADS-CoVs infection
Source: PubMed Central journal article supplement — Proc Natl Acad Sci U S A. 2022 Apr 27;119(18):e2118126119. doi: 10.1073/pnas.2118126119 (PMC9170153; doi:10.1073/pnas.2118126119), 2022-04-27
Supplement: pnas.2118126119.sapp.pdf [file pnas.2118126119.sapp.pdf]

## SI Appendix

### Supplemental Materials and Methods

#### Cells, plasmids and viruses

HEK293T (ATCC# CRL-11268), Huh7.5 cells (Dr. Charles M. Rice at The Rockefeller University and Apath, LLC) and Huh7.5 derivatives were maintained in DMEM with high glucose supplemented with 10% FBS, 100 mg/mL penicillin/streptomycin, 0.1 mM nonessential amino acids (NEAA), at 37°C. Vero81 (ATCC# CCL-81), were maintained in MEM supplemented with 5% FBS, P/S, NEAA and HEPES, at 37°C. Infection medium consists of DMEM + 2% FBS + NEAA + P/S, unless specified. PLAC8 sequences were cloned into the pαH backbone. SADS-CoV-Spike-C9 was codon-optimized and cloned into the pCDNA3.1 backbone. SADS-CoV-WT, RFP and nLuc were grown on Vero81 cells with 2.5 µg/ml of trypsin or in Huh7.5 cells in standard infection media.

#### Primers:

LentiCRISPR Miseq F: CCCTACACGACGCTCTTCCGATCTNNNNNGTGGAAAGGACGAAACACCG

LentiCRISPR Miseq R: GACTGGAGTTCAGACGTGTGCTCTTCCGATCTNNNNNGAGCCAGTACACGACATCAC

Truseq P5: AATGATACGGCGACCACCGAG

Truseq P7: CAAGCAGAAGACGGCATAACGAG

GAPDH qPCR F: AGCCACATCGCTCAGACAC

GAPDH qPCR R: GCCCAATACGACCAAATCC

SADS gRNA qPCR F: CTATCTGCCGATAGAGTCC

SADS gRNA qPCR R: CCTGGAACGAAATCTCAAATAC

SADS sgRNA qPCR F: CTATCTGCCGATAGAGTCC

SADS sgRNA qPCR R: GAGATTCCGCCTGTTCAA

hPLAC8 qPCR F: CCCGATATGGCATCCCTGGATCTATTTG

hPLAC8 qPCR R: CGCATGGCTCTCCTTCTGTTGATATCTC

rhPLAC8 qPCR F: CCCGATATGGCATCCCTGGATCTATTTG

rhPLAC8 qPCR R: CGCATGGCTCTCCTTCTGTTGATATCTC

mPLAC8 qPCR F: CCCGATACGGCATTCTGGATCTATTTG

mPLAC8 qPCR R: TTCATGGCTCTCCTCTGTTAATGTCTC

pigPLAC8 qPCR F: CTCGCTACGGCATCCCGG

pigPLAC8 qPCR R: TGCATGGCTCTCCTTCTGTTGATGTC

pangoPLAC8 qPCR F: CCCGATATGGCATCCAGGATCC

pangoPLAC8 qPCR R: TGCATGGCTCTCCTTCTGTTGATGTC  
batPLAC8 qPCR F: CTCGATACGGCATCCCGGGATCTATTTG  
batPLAC8 qPCR R: TTCATTTCTTTTCTTTTCTCAATATCTCGTTTGAGTTGAC  
SADS 3' end template F: GATCTCAATCTCAACAAGACCTAAATG  
SADS 3' end template R: CATACGAGGTGTGACGG

**Supplemental Figures**

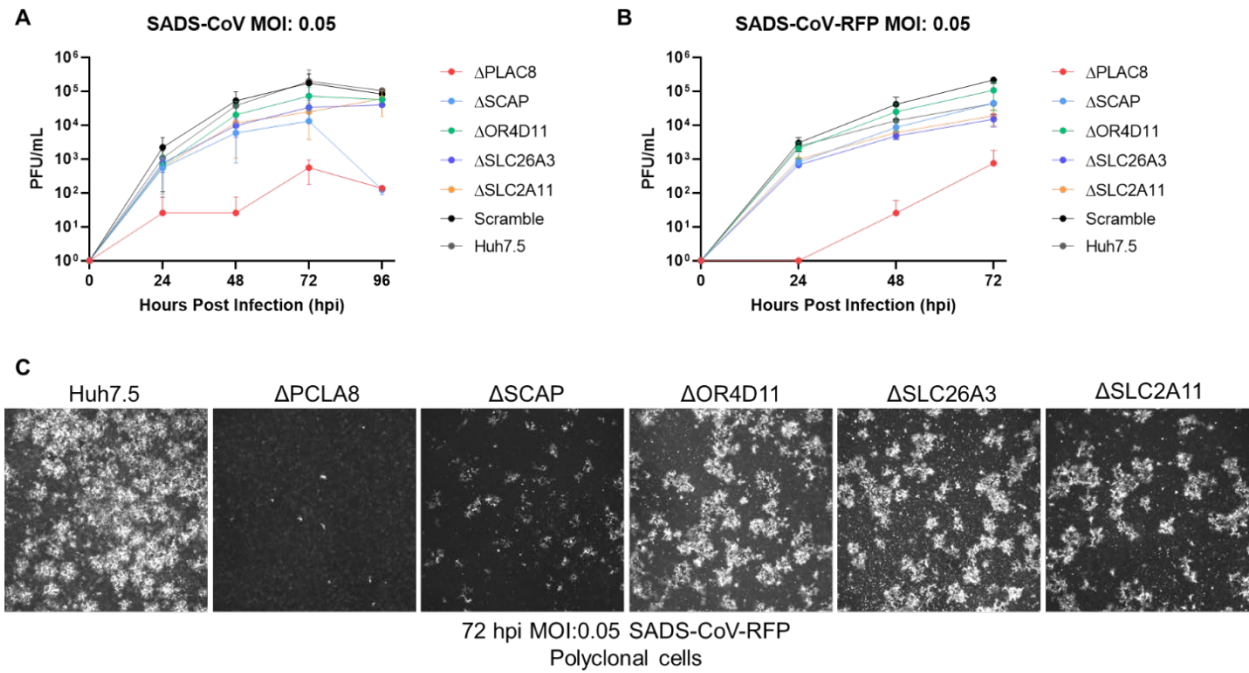

**Figure S1.** SADS-CoV growth kinetics on different polyclonal KO Huh7.5 cells. Viral growth curves of A) SADS-CoV infectious clone and B) SADS-CoV-RFP on different CRISPR KO cell line. C) Representative images of SADS-CoV-RFP infected cell lines at 72hpi as surrogate for viral infection and foci morphology.

ΔPLAC8 Clone

```

GGGTGTC AAGTTGCAGCTGATATGAATGAATGCTCTCTGTGGAACAAGCGTCGCAA TGGGACTCTCTACAGGACCCGATATGGCATCCCTgtgagctctcttaccataccat
GGGTGTC AAGTTGCAGCTGATATGAATGAATGCTCTCTGTGGAACAAGCGTCGCAA -SAGGACTCTCTACAGGACCCGATATGGCATCCCTGTGAGTCTCTTACCATACCAT Δ2nt
GGGTGTC AAGTTGCAGCTGATATGAATGAATGCTCTCTGTGGAACAAGCGTCGCAAAT SAGGACTCTCTACAGGACCCGATATGGCATCCCTGTGAGTCTCTTACCATACCAT +1nt

```

PAM

**Figure S2.** Sanger sequencing of Clonal PLAC8 KO cells as confirmation of clonality.

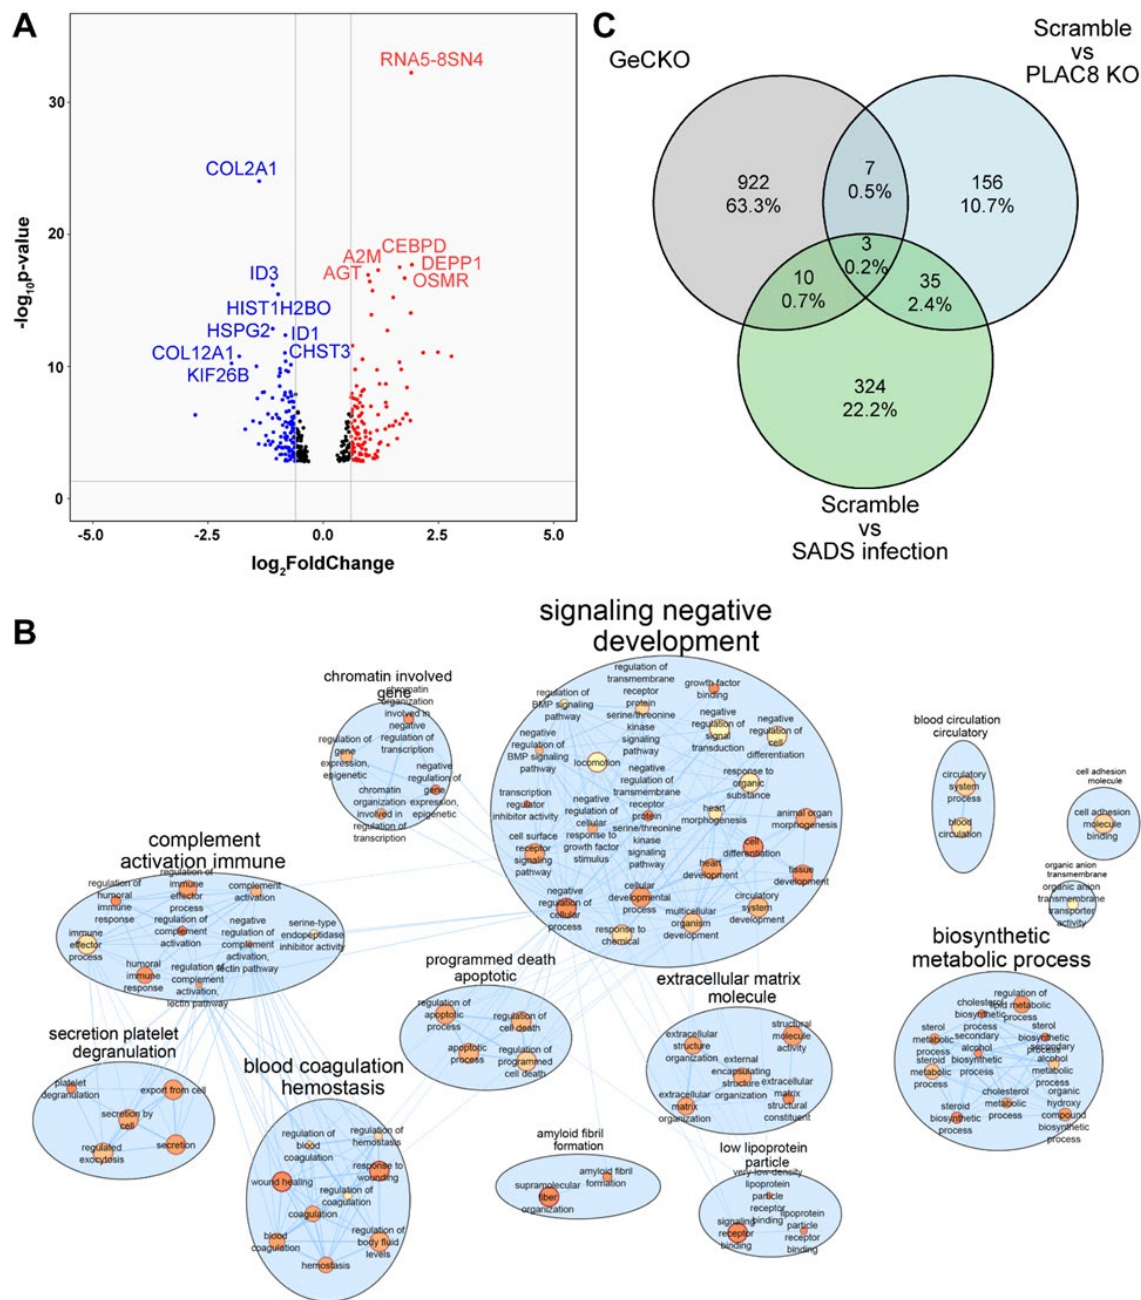

**Figure S3.** Transcriptomic changes after SADS-CoV infection. A) Volcano plot of significantly differentially expressed genes between Huh7.5 uninfected and SADS-CoV infected cells. Red denotes significantly upregulated genes, and blue denotes significantly downregulated genes. B) Cytoscape EnrichmentMap of significantly enriched GO pathways as determined by g:Profiler. C) Venn diagram of significant genes from the initial GeCKO screen, Scramble vs PLAC8 KO transcriptome, and Scramble vs SADS-infected transcriptome.

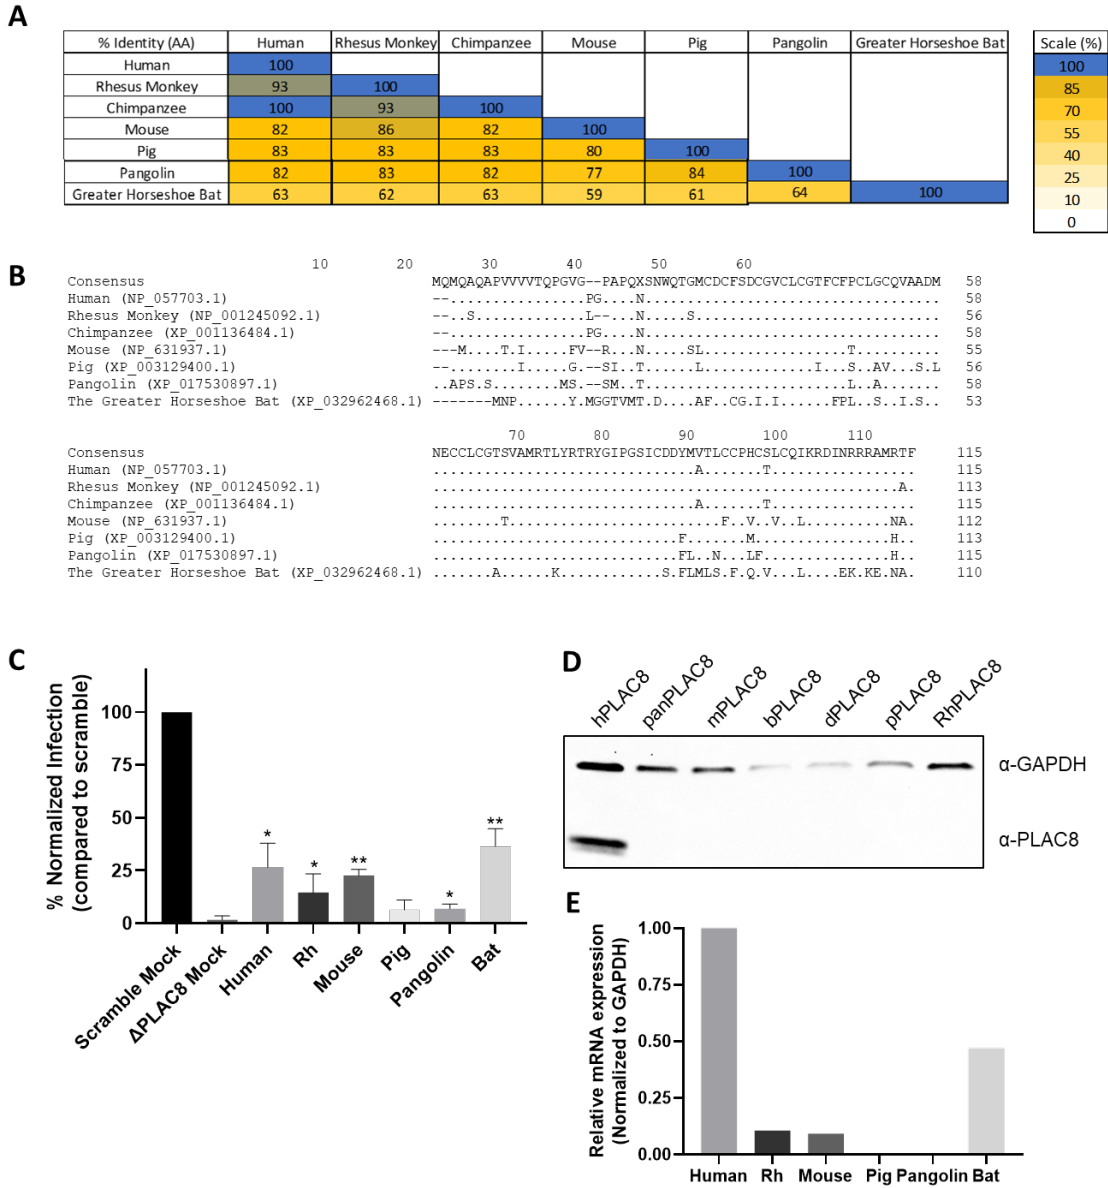

**Figure S4.** Complementation of PLAC8 KO cell with PLAC8 from eight different species. A) PLAC8 amino acid sequence identity between species (human, rhesus monkey, chimpanzee, mouse, pig, pangolin and bat). B) PLAC8 sequence alignment for all the above species. C) Complementation assay of PLAC8 KO Huh7.5 cells on SARS-CoV-nLuc infection after transient transfection of PLAC8 (not codon-optimized or tagged) from different species. D) Western blot image of PLAC8 from different species after transient transfection using mouse anti-hPLAC8 Ab. E) mRNA expression of PLAC8 of different species after transient transfection. F) Localization of hPLAC8-FLAG, codon-optimized-pigPLAC8-FLAG and codon-optimized-pangoPLAC8-FLAG from stable cell line using mouse anti-FLAG Ab.

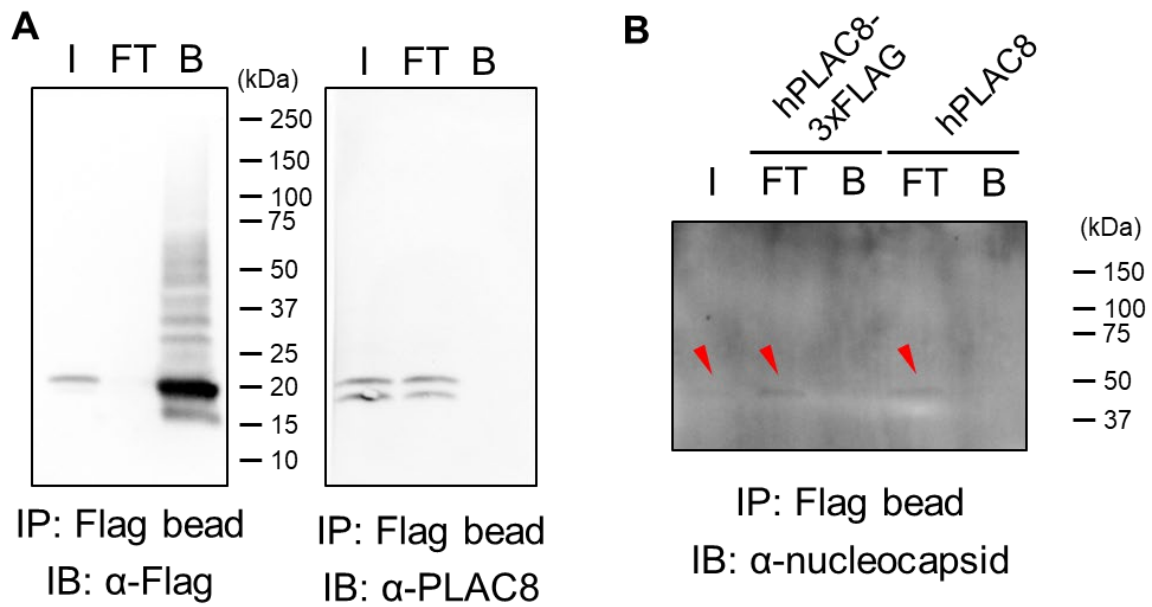

**Figure S5.** Immunoprecipitation of PLAC8 with intact SADS-CoV viral particles. A) Western blot of hPLAC8-Flag blotted with anti-FLAG antibody and pulled down by magnetic anti-FLAG beads. B) Following pull down, the presence of SADS-CoV was blotted with a mouse SADS-CoV N protein antiserum. I:input, FT: flow-through, B: Bound. Red arrows represent the expected bands of SADS-CoV N proteins.

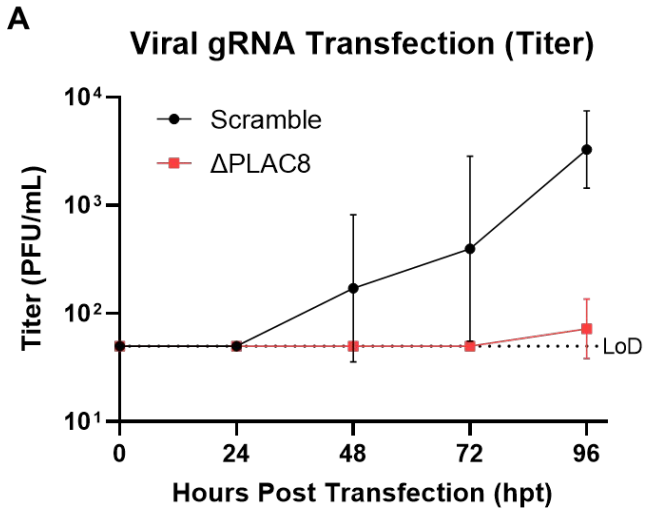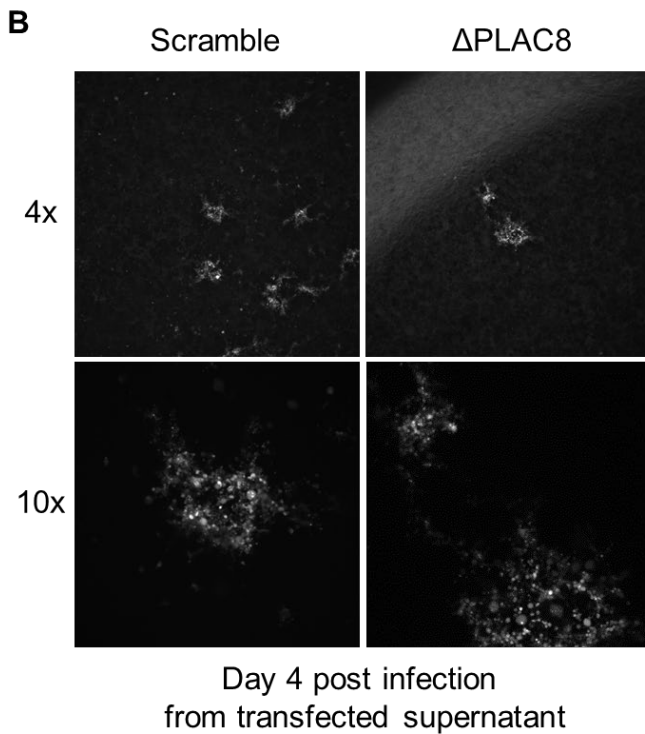

**Figure S6.** Progeny virus propagation after transfection of genomic RNA isolated from SADS-CoV-nLuc and SADS-CoV-RFP in Scramble and PLAC8 KO Huh7.5 cells. A) Viral titer of supernatant harvested from cells transfected with SADS-CoV-nLuc genomic RNA. B) Representative images of RFP signal in Scramble cells infected with the supernatant of Scramble and PLAC8 KO cells transfected with gRNA of SADS-CoV-RFP. Images were captured at 96 hpt with a 4x and 10x objectives, using RFP expression as a surrogate for viral infection.

**Table Legends**

| Rank | Gene    | Protein                                  | Cellular expression     | Tissue Distribution                             | Function                                   |
|------|---------|------------------------------------------|-------------------------|-------------------------------------------------|--------------------------------------------|
| 1*   | PLAC8   | Placenta Specific Gene 8 Protein         | Extracellular, Lysosome | Stomach, Small Intestine, Colon, Appendix, Lung |                                            |
| 2*   | SCAP    | SREBP Cleavage Activating Protein        | PM, ER, Golgi           | Ubiquitous, Testis                              | Cholesterol binding, ER to Golgi transport |
| 3    | TDO2    | Tryptophan 2,3-Dioxygenase               | Cytosol                 | Liver, Appendix                                 |                                            |
| 4*   | OR4D11  | Olfactory Receptor 4D11                  | PM                      |                                                 | GPCR (Signal Transduction)                 |
| 5*   | SLC26A3 | Solute Carrier Family 26 Member 3        | PM                      | Colon, Duodenum, Small Intestine                | Chloride Anion Exchanger                   |
| 6    | PSG8    | Pregnancy Specific Beta-1-Glycoprotein 8 | Extracellular           | Placenta                                        |                                            |
| 7    | ACP2    | Lysosomal Acid Phosphatase               | Lysosome                | Ubiquitous, Duodenum                            |                                            |
| 8    | C2orf83 | Folate Transporter-Like Protein C2orf83  | Extracellular           | Placenta, Testis                                | Paralog of SLC19A3                         |
| 9    | WDR86   | WD Repeat Domain 86                      |                         | Ubiquitous                                      |                                            |
| 10*  | SLC2A11 | Solute Carrier Family 2 Member 11        | PM, Nucleus             | Kidney                                          | Glucose Transporter                        |

**Table S1.** Top 10 enriched guide RNAs from SADS-CoV CRISPR screen, their cellular expression, tissue distribution, and a brief description. Asterisks represent targets selected for further work in this study.

|                | Wang et al. |       |       | Schneider et al.                                  |              |           |           |      | Daniloski et al. |               | Wei et al.     |              |
|----------------|-------------|-------|-------|---------------------------------------------------|--------------|-----------|-----------|------|------------------|---------------|----------------|--------------|
|                | Huh7.5      |       |       | Huh7.5                                            |              |           |           |      | A549-hACE2       |               | Vero-E6        |              |
|                | SARS2       | 229E  | OC43  | SARS2 (37°C)                                      | SARS2 (33°C) | OC43      | NL63      | 229E | SARS2 (moi:1)    | SARS2 (moi:3) | SARS2          | SARS2        |
| <b>PLAC8</b>   | >1000       | >1000 | >1000 | NS                                                | NS           | NS        | 39 (3.21) | NS   | >1000            | >1000         | 0.177 (9639)   | 0.913 (2522) |
| <b>SCAP</b>    | 2           | >1000 | 117   | 12 (5.85)                                         | 49 (3.99)    | 45 (4.41) | NS        | NS   | >1000            | >1000         | -2.281         | -1.070       |
| <b>TDO2</b>    | >1000       | >1000 | >1000 | NS                                                | NS           | NS        | NS        | NS   | >1000            | >1000         | 0.806 (3992)   | -0.171       |
| <b>OR4D11</b>  | >1000       | >1000 | >1000 | NS                                                | NS           | NS        | NS        | NS   | >1000            | >1000         | n/a            |              |
| <b>SLC26A3</b> | >1000       | >1000 | 773   | NS                                                | NS           | NS        | NS        | NS   | >1000            | >1000         | -0.055         | 1.227 (1148) |
| <b>PSG8</b>    | 497         | >1000 | >1000 | NS                                                | NS           | NS        | NS        | NS   | >1000            | >1000         | n/a            |              |
| <b>ACP2</b>    | >1000       | >1000 | 876   | NS                                                | NS           | NS        | NS        | NS   | >1000            | >1000         | 0.311 (8313)   | -1.244       |
| <b>C2orf83</b> | >1000       | >1000 | >1000 | NS                                                | NS           | NS        | NS        | NS   | >1000            | >1000         | n/a            |              |
| <b>WDR86</b>   | >1000       | >1000 | >1000 | NS                                                | NS           | NS        | NS        | NS   | >1000            | >1000         | -0.025         | -0.244       |
| <b>SLC2A11</b> | >1000       | >1000 | >1000 | NS                                                | NS           | NS        | NS        | NS   | >1000            | >1000         | 0.065 (10740)  | 0.260 (8421) |
|                | Rank        |       |       | Rank (Z-score), NS - not significant (FDR > 0.05) |              |           |           |      | Rank             |               | Z-score (Rank) |              |

**Table S2.** Comparison of the top 10 enriched guide RNAs of this study to multiple CRISPR screen on SARS-CoV-2 and other CoVs. Green highlighted cells represent overlaps between studies.

## Supporting Scripts

Truncateguides.pl

```
#this program parses through your reads taking only those with caccg
#it then truncates the sequence to what is in between caccg and gtta
#it outputs these truncated guides in an out file
#it tells you how many reads it put in the out file in the command line
use strict; use warnings;

die "please specify an input .fastq file and an output .txt file" unless @ARGV == 2;
open(IN, "<$ARGV[0]>") or die "can't open file $ARGV[0]";
open(OUT, ">$ARGV[1]>") or die "can't open file $ARGV[1]";

my @lines = ();
my $line = 0;
while (<IN>) {
push (@lines, $_);
}

#print "The amount of lines is " . @lines . " \n ";

my $readcount = 0;
my $motif = "CACCG";
my @guides = ();
my @headers = ();
my @plus = ();
my @quality = ();
foreach (@lines) {$line = $_;
if ( $_ =~ /$motif/) {$readcount = ($readcount+1);}
if ( $_ =~ /$motif/) {push (@guides, $_) ;}
elsif ( $_ =~ m/^\@/) {push (@headers, $_) ;}
elsif ( $_ =~ m/^\+/) {push (@plus, $_) ;}
else {push (@quality, $_) ;}
}

my @guides1 = ();
my @guides2 = ();
```



```

my $guides = 0;
foreach (@guides) {$guides = $_; @guides1 = split ("CACCG", $guides);
push @guides2, $guides1[1];}
my @guides3 = ();
my $guides2 = 0;
my @guides4 = ();
my $numberguides2 = scalar(@guides2);
my $number = $numberguides2 - 1;
for (my $i = 0; $i < $number; $i++) {if($guides2[$i] =~ /GTTTTA/)
{push (@guides3, $guides2[$i])};}
my @guides5 = ();
foreach (@guides3) {my $guides3 = $_; @guides4 = split ("GTTTTA",
$guides3); {push
@guides5,
$guides4[0]};}
#there may be an issue if there is no gtttta, may get some false reads
print "The number of reads is " . $readcount . "\n";
my $joinedguides = join (" \n", @guides5);
my $numberguides5 = scalar(@guides5);
my $number2 = $numberguides5 - 1;
for (my $i = 0; $i < $number2; $i++) {
print OUT ($headers[$i]);
print OUT ($guides5[$i] . "\n");
print OUT ($plus[$i]);
print OUT ($quality[$i]);
}
close IN or die "Cannot close input";
close OUT or die "Cannot close output \n";
# print join(',', @lines); # see if it worked
Ggplot_mageck_genefunction.r
library("ggplot2")
library("scale")

```

```

data<- read.csv("SADS.gene_summary.txt", header=TRUE, sep="\t", stringsAsFactors = FALSE)
data$Rand <- sample(5:500, replace=T, nrow(data))
data$log.p<- -1 * log10(data$pos.p.value)
top10<- data[1:10,]
scale=c(0,1,2,3,4,5,6,7)
label=c(0,1,2,3,4,5,6,7)
windowsFonts(A=windowsFont("Arial"))
library(viridis)
tiff("SADS gene functions.jpg", units="in", width=12, height=12, res=300)
qplot(x=Rand, y=log.p, data=data, color=Function, size=pos.lfc, shape=TM, alpha=0.5, geom="point",
xlab="", ylab="-log(p-value)") +
scale_radius(range=c(0.001,20)) +
scale_y_continuous(limits=c(0,7), breaks=scale, labels=label) +
theme(panel.grid.major=element_blank(), panel.grid.minor=element_blank(),
axis.text.x = element_blank(), axis.ticks.x = element_blank(),
axis.text.y=element_text(family="A", color="black"),
axis.title.y=element_text(family="A", color="black"), legend.position="none",
panel.border=element_rect(colour="black", fill=NA,
size=1),panel.background=element_rect(fill="grey98")) +
annotate("text", x=as.numeric(top10$Rand), y=as.numeric(top10$log.p), family="A", label=top10$Id ) +
scale_color_manual(values =
c("deeppink2","darkorange1","black","gold","red2","navy","darkorchid4")) +
scale_shape_manual(values=c(16,18))
dev.off()
DESeq-heatmap.r
library(DESeq2)
counts <- read.table(file="counts_S1v1b2.txt",sep="\t",header=T)
rownames(counts) <- make.names(counts[,1], unique = TRUE)
meta <- read.table(file="meta_S1v1b2.txt",sep="\t",header=T,row.names=1)
#read in data
counts.ann <- counts[,2:6]
counts.num <- counts[,-1*1:6]

```

```

counts.num[is.na(counts.num)] <- 0
counts.num[, 1:6] <- apply(counts.num[, 1:6], 2,function(x) as.integer(x))
#separate into annotation columns and count columns
temp <- dimnames(counts.num)
#creates variable holding the column and row names of counts.num
counts.num<- apply(counts.num,2,function(counts.num){as.numeric(as.vector(counts.num))})
#converts numbers from factor variable to numeric
rc<- round( colSums(counts.num) / 1e6, 1 )
#takes the sum of the columns, divide by 10^6 for millions of reads
dimnames(counts.num)<-temp
#puts row and column names back on counts.num
counts.num<- counts.num[,rownames(meta)]
#ensures that columns of counts.num and rows of meta are in the same order
meds<- apply(counts.num,2,function(counts.num){quantile(counts.num[counts.num>0],0.75)})
#takes the top quartile of all reads above 0
normFactor<- median(meds)/meds
#creates normalization factor from the quartile variable
counts.norm<- t(apply(counts.num,1,function(x,y){y*x},normFactor))
#multiply the reads by normalization factor
means<- apply(counts.num,1,mean)
sds<- apply(counts.num,1,sd)
#mean and standard deviation of columns of counts.num
means.n<- apply(counts.norm,1,mean)
sds.n<- apply(counts.norm,1,sd)
#same metrics as above, with normalized data
counts.ns<- t(scale(t(log10(counts.norm+1)),scale=F))
#scale centers the means; only works on columns, so transform; =F means won't scale variance
#function creating a list of colors for heatmap
cols <- function(lowi = "yellow", highi = "blue", ncolors = 20) {
low <- col2rgb(lowi)/255
high <- col2rgb("black")/255
col1 <- rgb(seq(low[1], high[1], len = ncolors), seq(low[2],

```

```

high[2], len = ncolors), seq(low[3], high[3], len = ncolors))
low <- col2rgb("black")/255
high <- col2rgb(highi)/255
col2 <- rgb(seq(low[1], high[1], len = ncolors), seq(low[2],
high[2], len = ncolors), seq(low[3], high[3], len = ncolors))
col<-c(col1[1:(ncolors-1)],col2)
return(col)
}
#supervised analysis
filt<- rowSums(counts.num)>1
counts.num<- counts.num[filt,]
counts.ns<- counts.ns[filt,]
counts.norm<- counts.norm[filt,]
counts.ann<- counts.ann[filt,]
chrs<- chrs[filt]
#running tests for differential expression
des.Variable<- DESeqDataSetFromMatrix(countData = counts.num, colData = meta, design = ~ Variable)
des.Variable<- DESeq(des.Variable)
results<- results(des.Variable, cooksCutoff=FALSE)
sum(results$padj< 0.05, na.rm=T)
#how many are significant
gfilt<- results$padj<0.05 & !is.na(results$padj)
#filter to pull out significant genes
rownames(counts.num) [gfilt]
#puts out genes that are significant
sum(rownames(results)==rownames(counts.ns))
#checks to make sure you have the same row names, in the same order
library(heatmap3)
counts.norm_sig <- counts.norm[gfilt,]
tiff("S1v1b2_heatmap.tiff", units="in", width=8, height=8, res=300)
heatmap3(counts.norm_sig,col=cols(),labRow=FALSE)
dev.off()

```

```

write.table(results,"S1v1b2_results.txt",sep="\t",col.names=NA)
write.table(results[gfilt,],"S1v1b2_sig_results.txt",sep="\t",col.names=NA)
Volcanoplot.r
library(ggplot2)
library(ggrepel)
results <- read.table(file="S1v1b2_results.txt",sep="\t",header=T)
results$diffexpressed <- "NO"
results$diffexpressed[results$log2FoldChange > 0.6 & results$pvalue < 0.05] <- "UP"
results$diffexpressed[results$log2FoldChange < -0.6 & results$pvalue < 0.05] <- "DOWN"
results <- results[order(results$pvalue),]
results$delabel <- NA
results$delabel[results$diffexpressed != "NO"] <- results$X[results$diffexpressed != "NO"]
up <- results[results$diffexpressed == "UP",]
down <- results[results$diffexpressed == "DOWN",]
topup <- up[1:3,]
topdown <- down[1:8,]
top <- rbind(topup,topdown)
windowsFonts(A=windowsFont("Arial"))
tiff("S1v1b2_volcano.tiff", units="in", width=8, height=8, res=300)
ggplot(data=results, aes(x=log2FoldChange, y=-log10(pvalue), col=diffexpressed)) + geom_point() +
#geom_text_repel(data=top, aes(label=delabel)) +
theme(panel.grid.major=element_blank(), panel.grid.minor=element_blank(),
axis.text.x=element_text(family="A", color="black"),
axis.text.y=element_text(family="A", color="black"), axis.title.x=element_text(family="A",
color="black"),
axis.title.y=element_text(family="A", color="black"), legend.position="none",
panel.border=element_rect(colour="black", fill=NA,
size=1),panel.background=element_rect(fill="grey98")) +
geom_vline(xintercept=c(-0.6,0.6), col="gray") + geom_hline(yintercept=-log10(0.05),col="gray") +
xlim(-8,8) + ylim(0,30) + scale_color_manual(values=c("blue", "black", "red"))
dev.off()

```
